# Supplementary material for: Hydrogen sulfide donor AP123 restores endothelial nitric oxide-dependent vascular function in hyperglycemia via a CREB-dependent pathway
Source: PubMed Central journal article supplement — Redox Biol. 2023 Mar 4;62:102657. doi: 10.1016/j.redox.2023.102657 (PMC10025109; doi:10.1016/j.redox.2023.102657), 2023-03-04
Supplement: mmc3.pdf [file mmc3.pdf]

Western blot uncropped images (figure 3A)

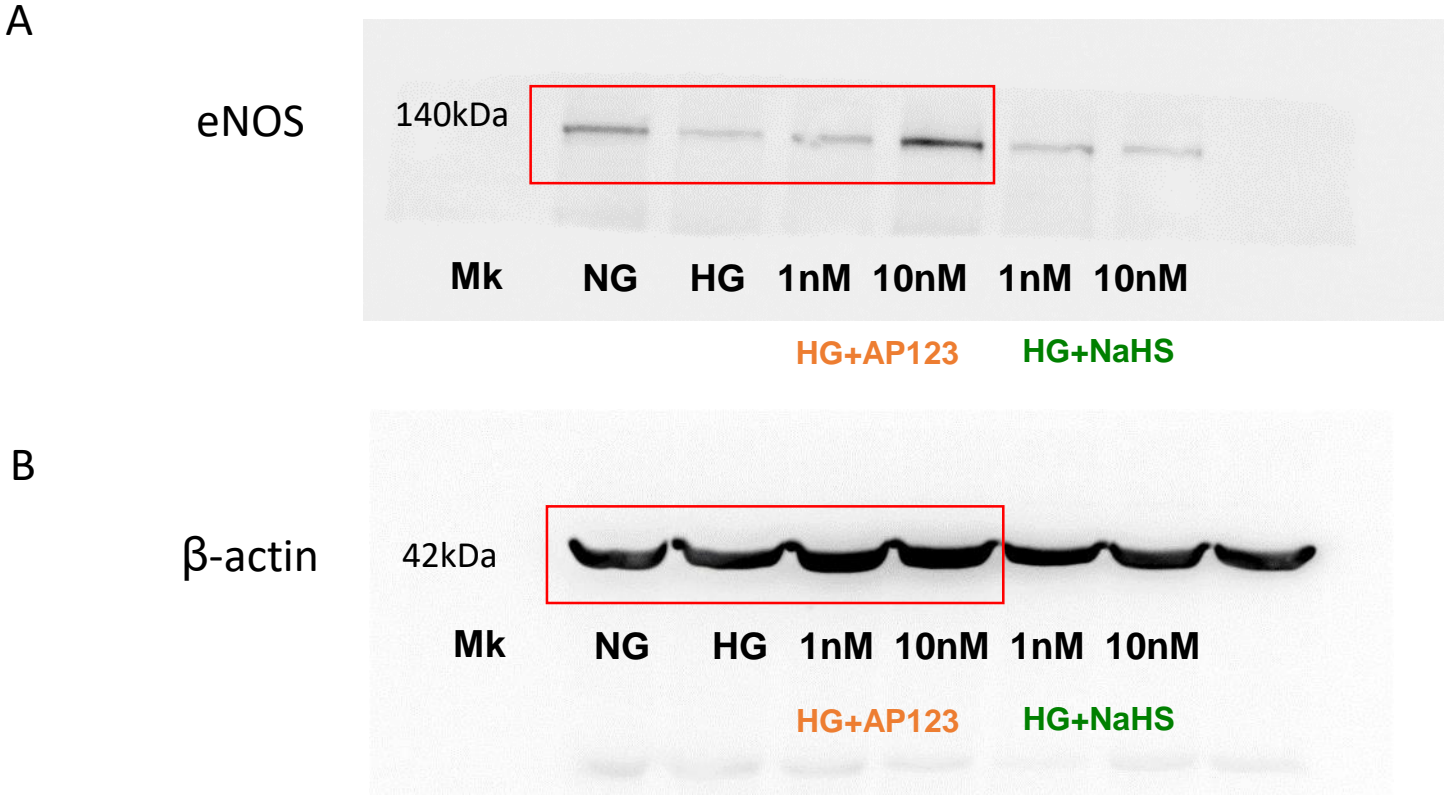

Legend: Uncropped membranes for eNOS (A) and  $\beta$ -actin (B) acquired in chemiluminescence field. Membrane has been cut as a normal procedure to optimize the use of antibodies. Marker (Mk) is indicated, although the chemiluminescence setting of the Image Acquisition apparatus (Chemidoc, BioRad) does not allow to visualize it. Red rectangles indicate the bands used to build up the corresponding images in the manuscript figure. Please note that difference in the background brightness is due to the different digital exposure settings upon the diverse antibodies used.

## Western blot uncropped images (figure 3C)

A p-CREB

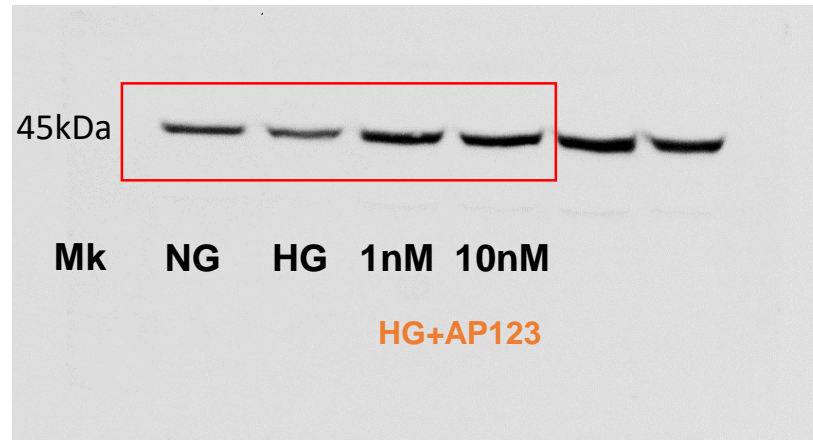

B CREB

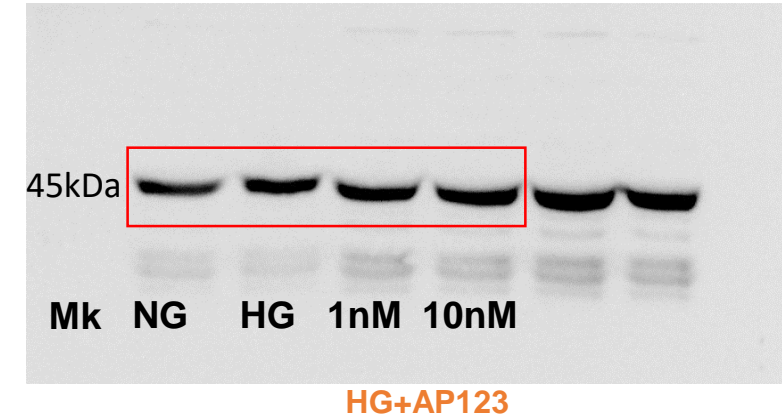

C  $\beta$ -actin

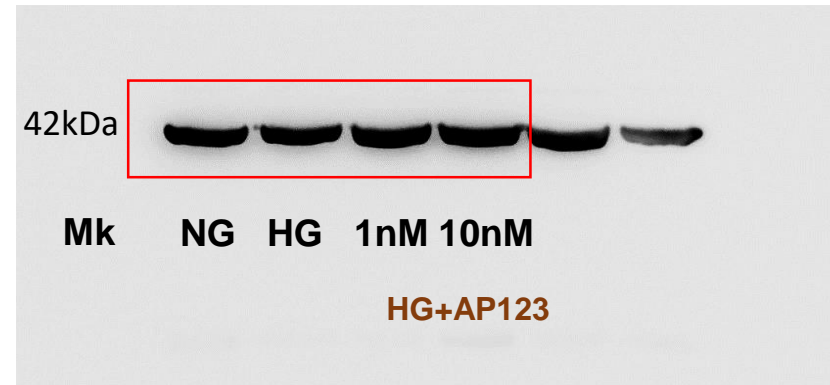

Legend: Uncropped membranes for p-CREB (A), CREB (B) and  $\beta$ -actin (C) acquired in chemiluminescence field. Membrane has been cut as a normal procedure to optimize the use of antibodies. Marker (Mk) is indicated, although the chemiluminescence setting of the Image Acquisition apparatus (Chemidoc, BioRad) does not allow to visualize it. Red rectangles indicate the bands used to build up the corresponding images in the manuscript figure. Please note that difference in the background brightness is due to the different digital exposure settings upon the diverse antibodies used.

## Western blot uncropped images (figure 4B)

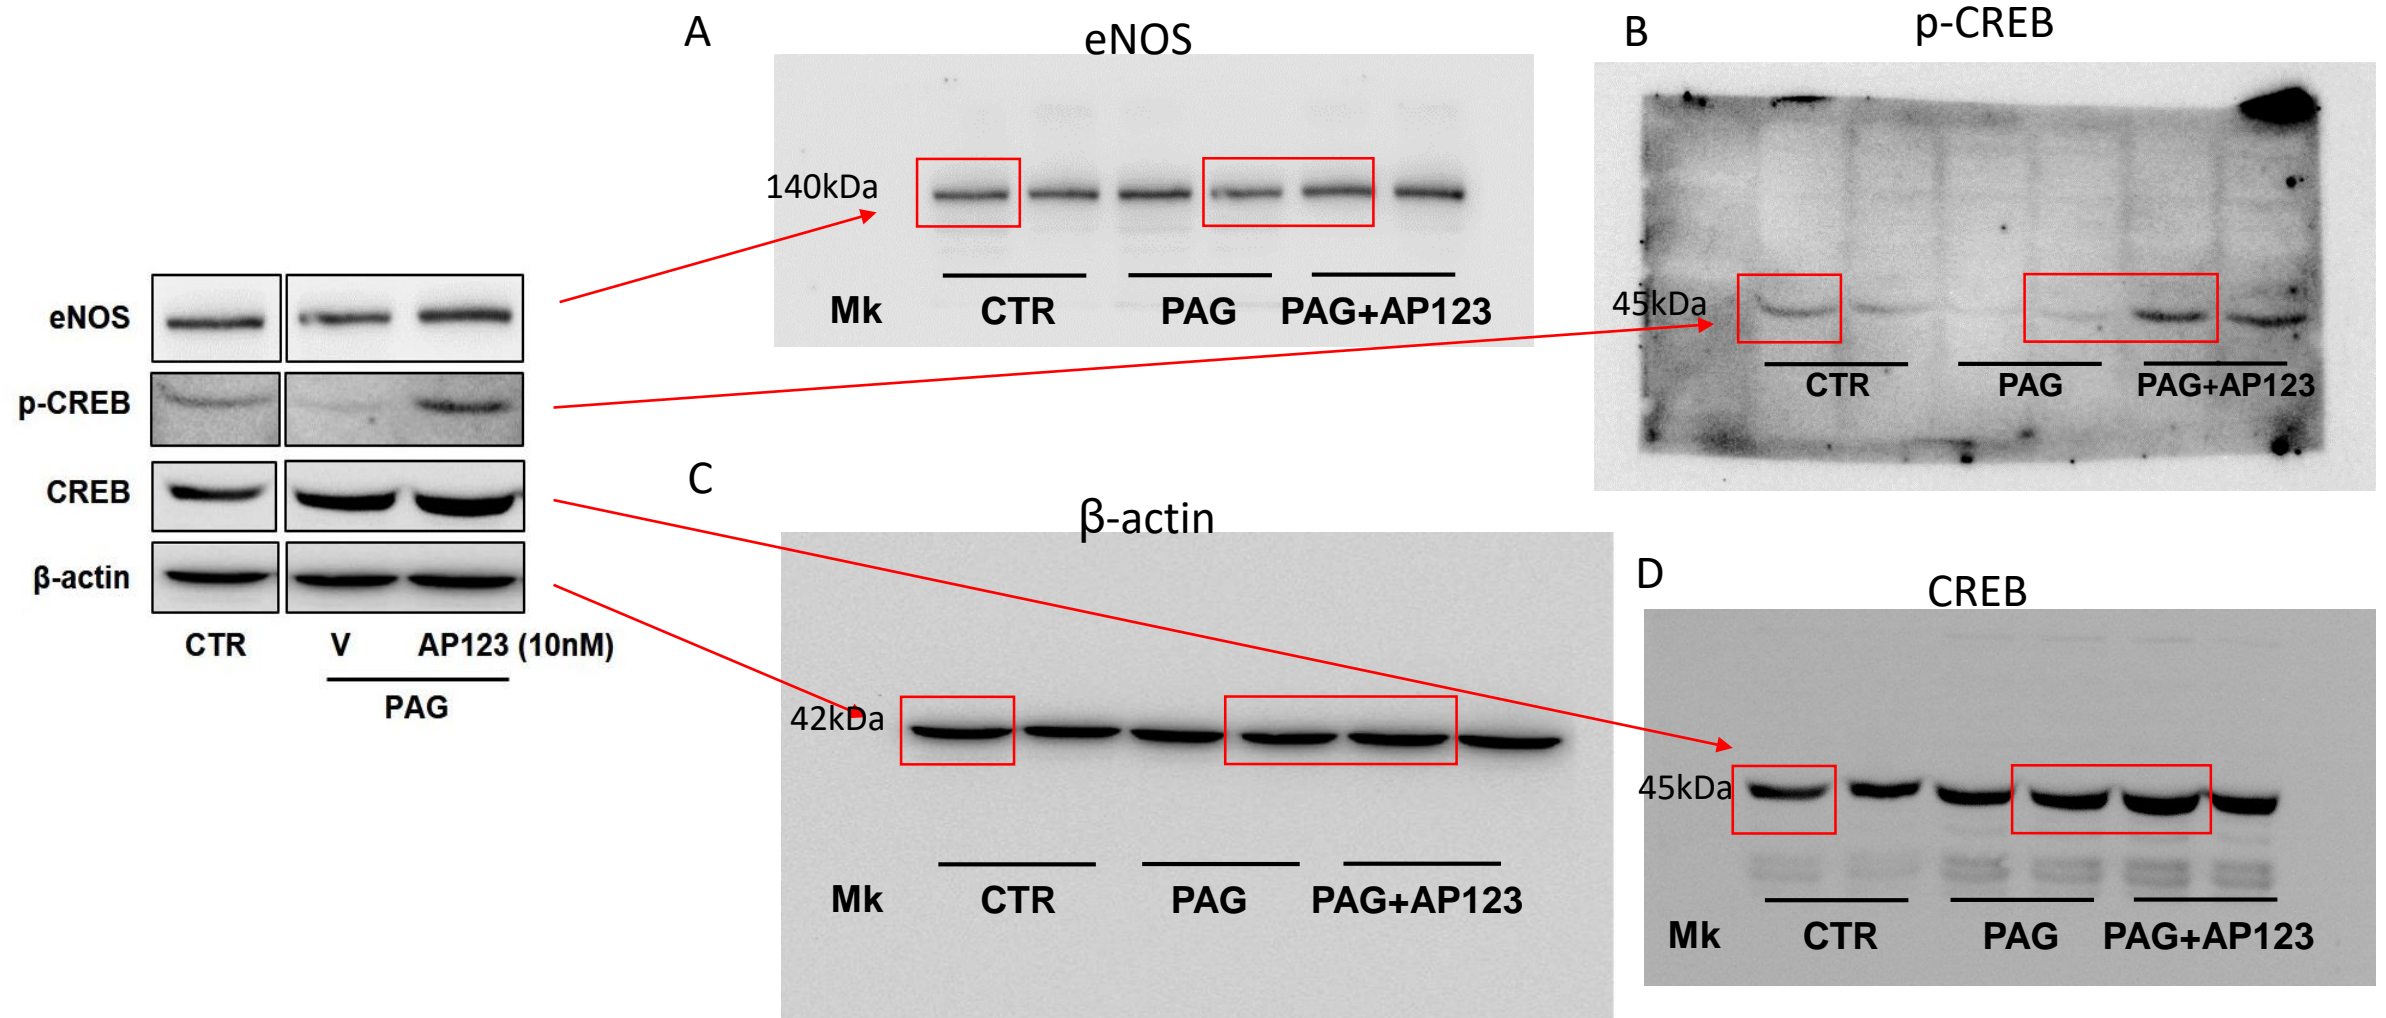

Legend: Uncropped membranes for eNOS (A), p-CREB (B), β-actin (C) and CREB (D) acquired in chemiluminescence field. Membrane has been cut as a normal procedure to optimize the use of antibodies. Marker (Mk) is indicated, although the chemiluminescence setting of the Image Acquisition apparatus (Chemidoc, BioRad) does not allow to visualize it. Red rectangles indicate the bands used to build up the corresponding images in the manuscript figure. Please note that difference in the background brightness is due to the different digital exposure settings upon the diverse antibodies used.

Western blot uncropped images (figure 5A)

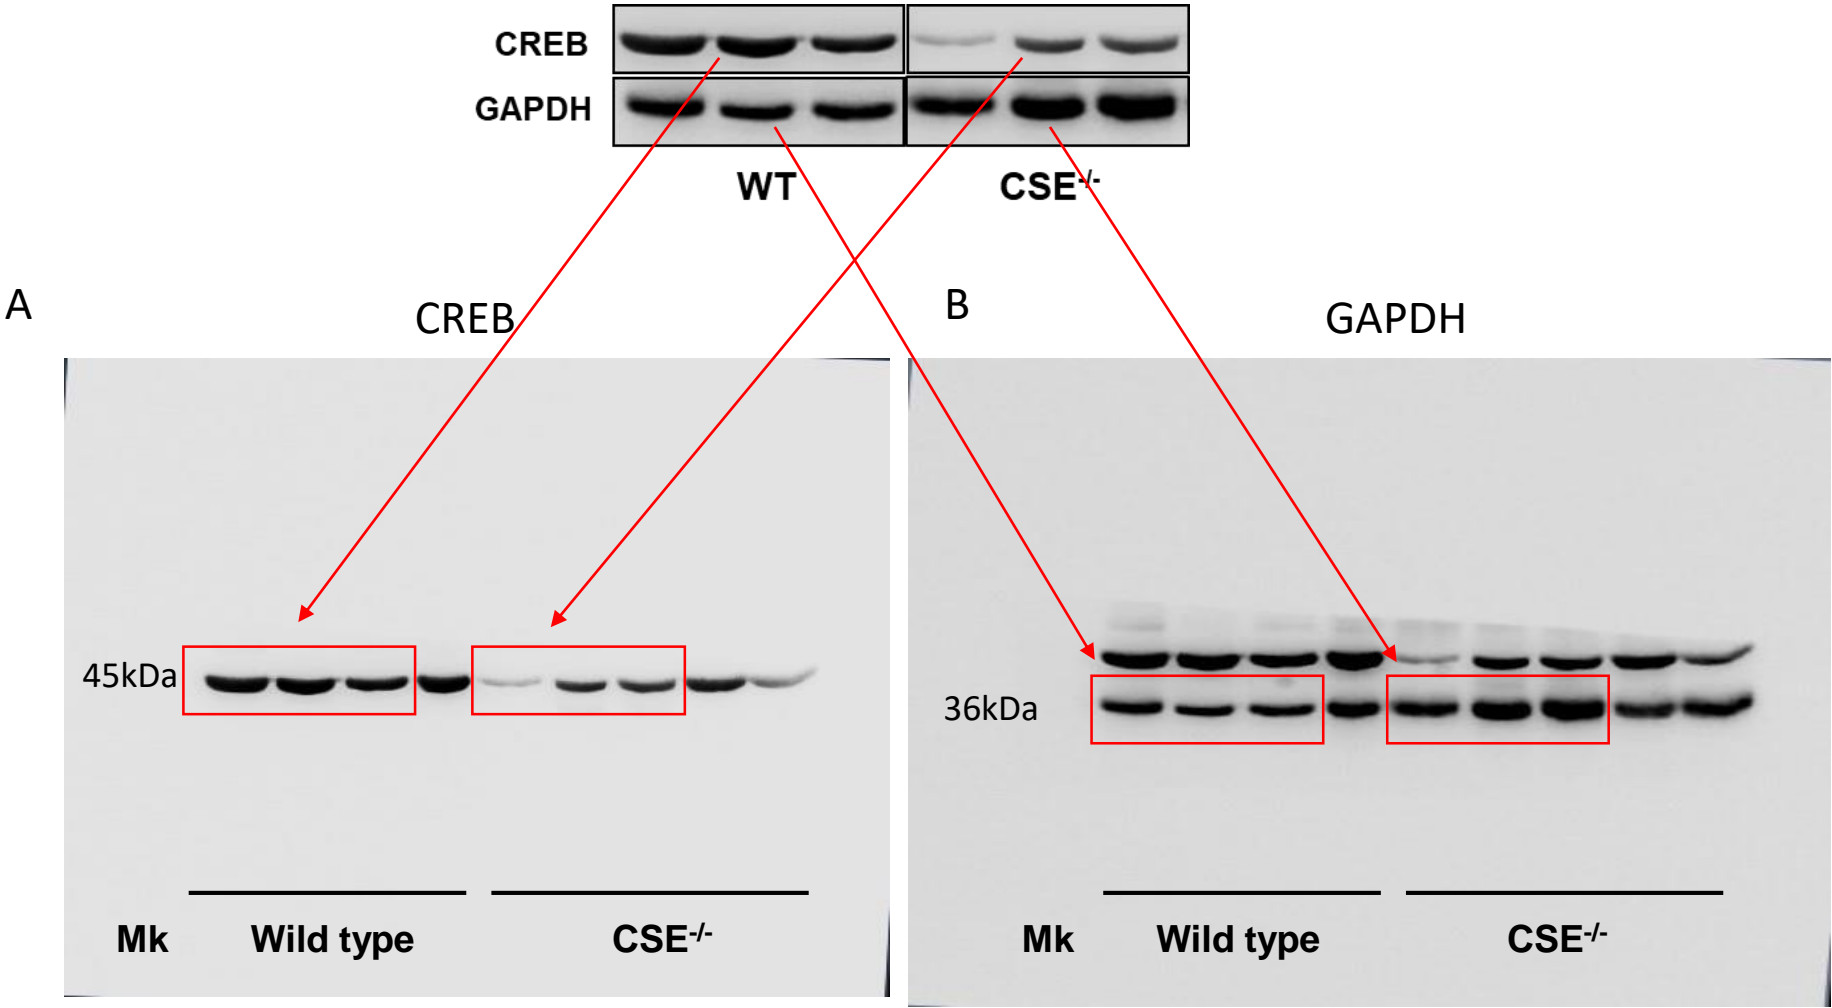

Legend: Uncropped membranes for CREB (A) and GAPDH (B) acquired in chemiluminescence field. Membrane has ben cut as a normal procedure to optimize the use of antibodies. Marker (Mk) is indicated, although the chemiluminescence setting of the Image Acquisition apparatus (Chemidoc, BioRad) does not allow to visualize it. Red rectangles indicate the bands used to build up the corresponding images in the manuscript figure. We want also to point out that we erroneously marked in the figure the housekeeping protein as  $\beta$ -actin instead of GAPDH. This has now been corrected in the revised version of the manuscript. Please note that difference in the background brightness is due to the different digital exposure settings upon the diverse antibodies used.

## Western blot uncropped images (figure 6B)

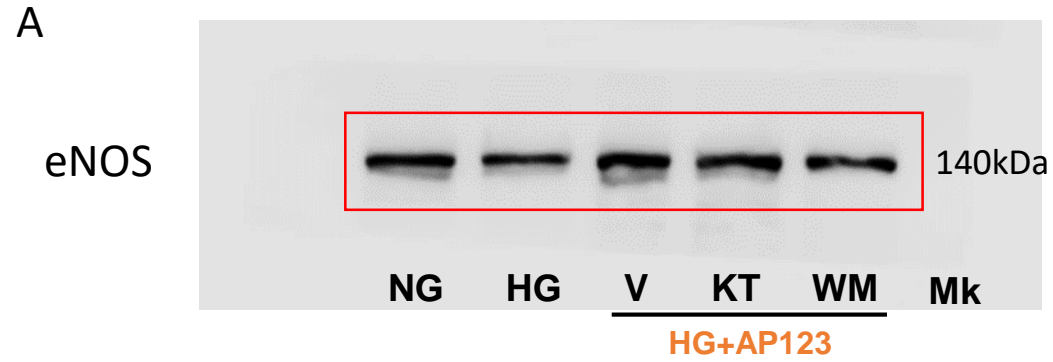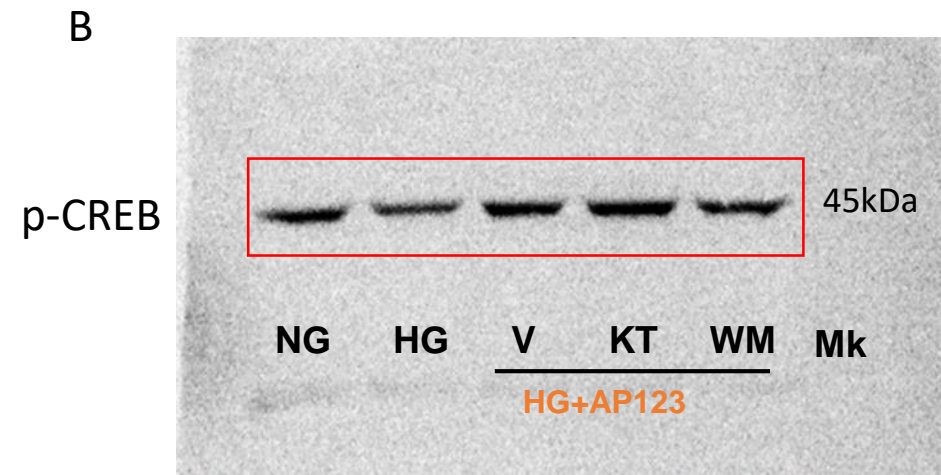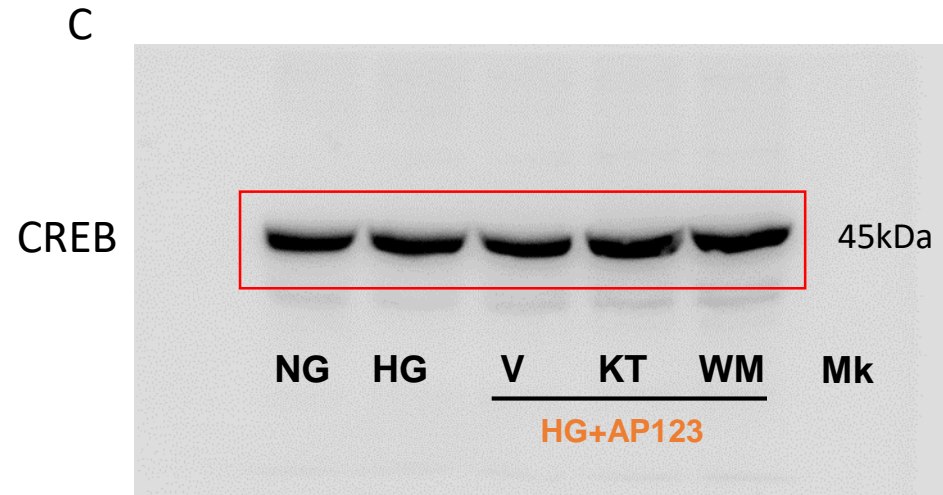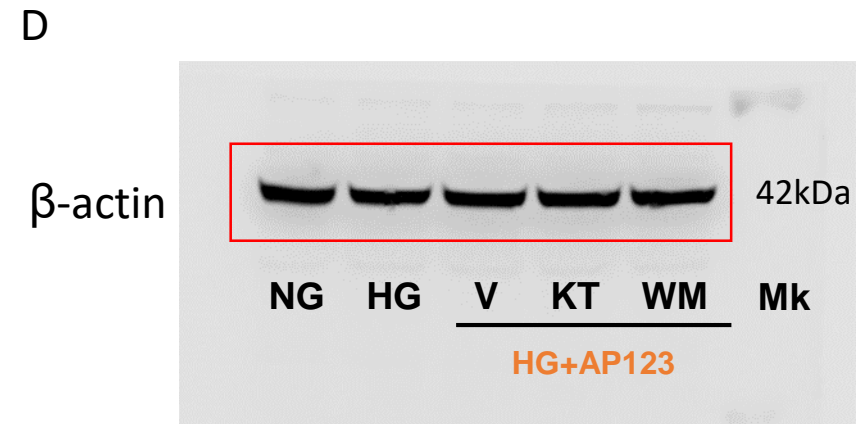

Legend: Uncropped membranes for eNOS (A), p-CREB (B), CREB (C) and  $\beta$ -actin (D) acquired in chemiluminescence field. Membrane has been cut as a normal procedure to optimize the use of antibodies. Marker (Mk) is indicated, although the chemiluminescence setting of the Image Acquisition apparatus (Chemidoc, BioRad) does not allow to visualize it. Red rectangles indicate the bands used to build up the corresponding images in the manuscript figure. Please note that difference in the background brightness is due to the different digital exposure settings upon the diverse antibodies used.

Western blot uncropped images (supplemental figure 5)

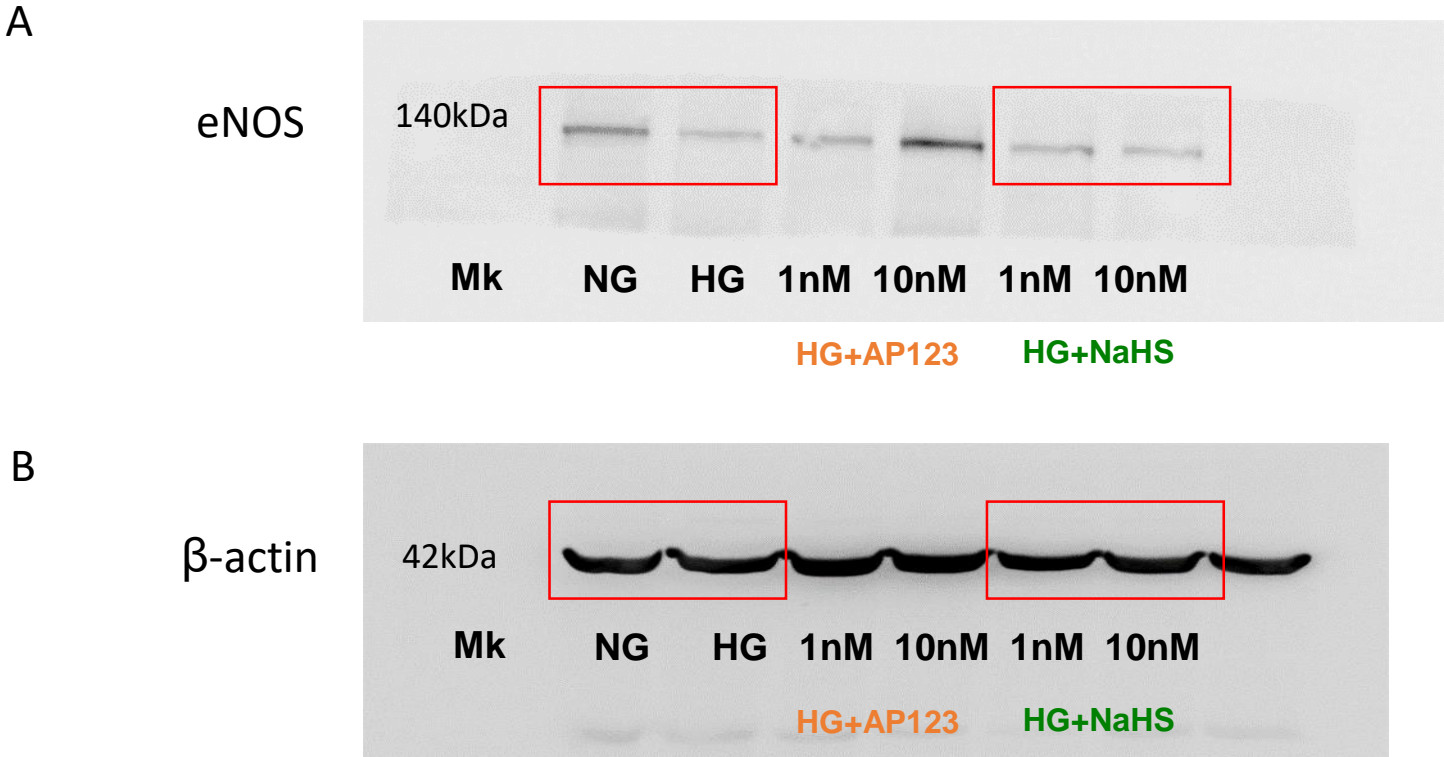

Legend: Uncropped membranes for eNOS (A) and  $\beta$ -actin (B) acquired in chemiluminescence field. Membrane has been cut as a normal procedure to optimize the use of antibodies. Marker (Mk) is indicated, although the chemiluminescence setting of the Image Acquisition apparatus (Chemidoc, BioRad) does not allow to visualize it. Red rectangles indicate the bands used to build up the corresponding images in the manuscript figure. Please note that difference in the background brightness is due to the different digital exposure settings upon the diverse antibodies used.
