# Supplementary figures and images for: Hydrogen sulfide donor AP123 restores endothelial nitric oxide-dependent vascular function in hyperglycemia via a CREB-dependent pathway
Source: PubMed Central journal article supplement — Redox Biol. 2023 Mar 4;62:102657. doi: 10.1016/j.redox.2023.102657 (PMC10025109; doi:10.1016/j.redox.2023.102657), 2023-03-04

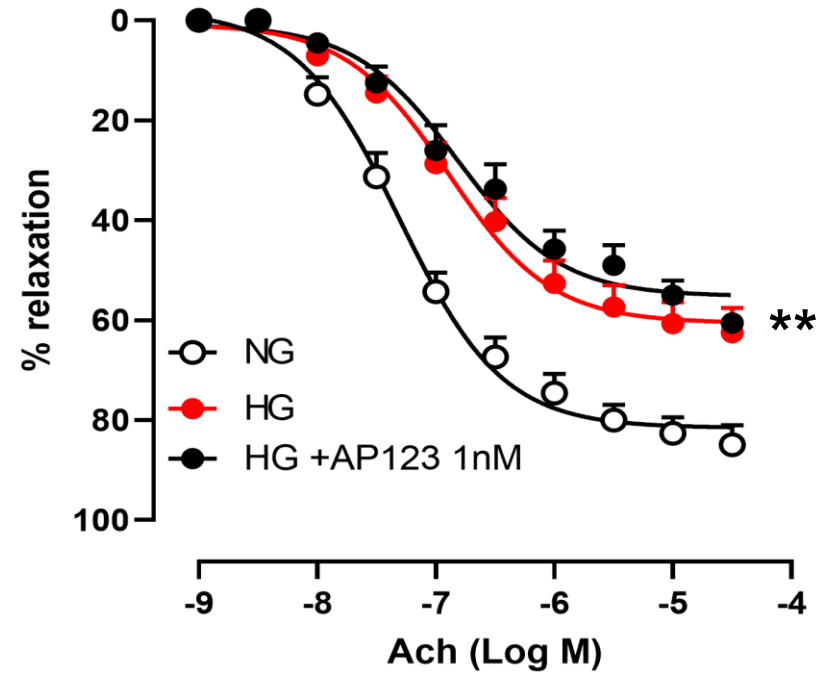

Supplemental figure S1

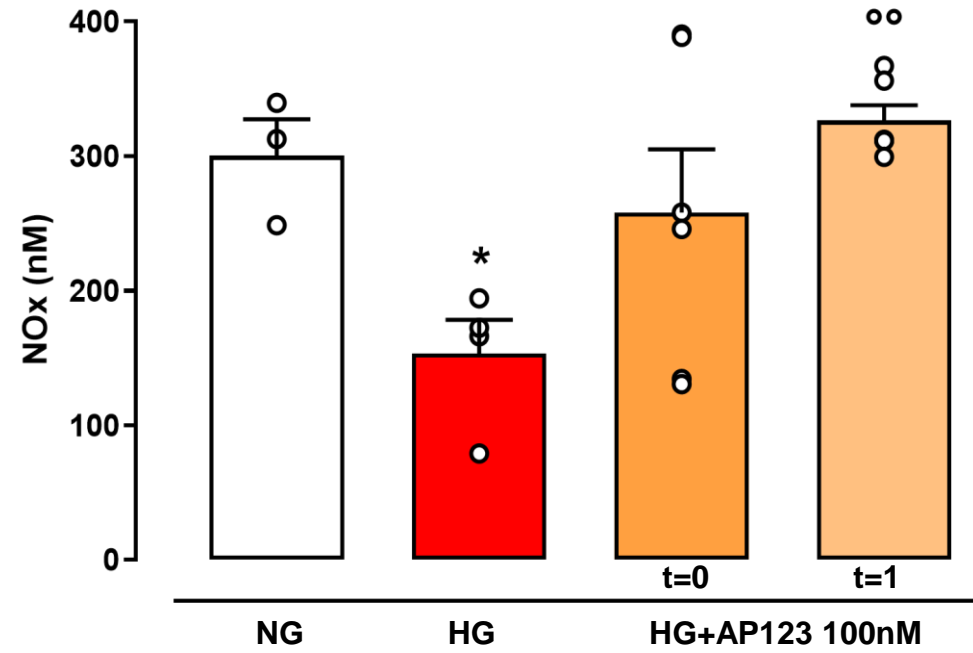

A

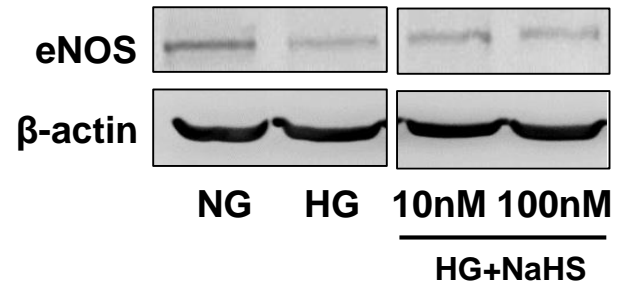

B

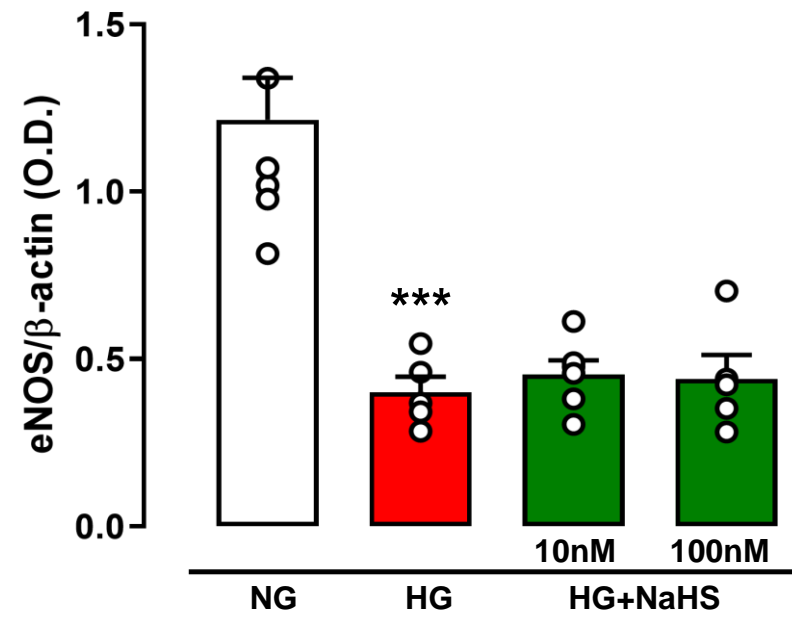

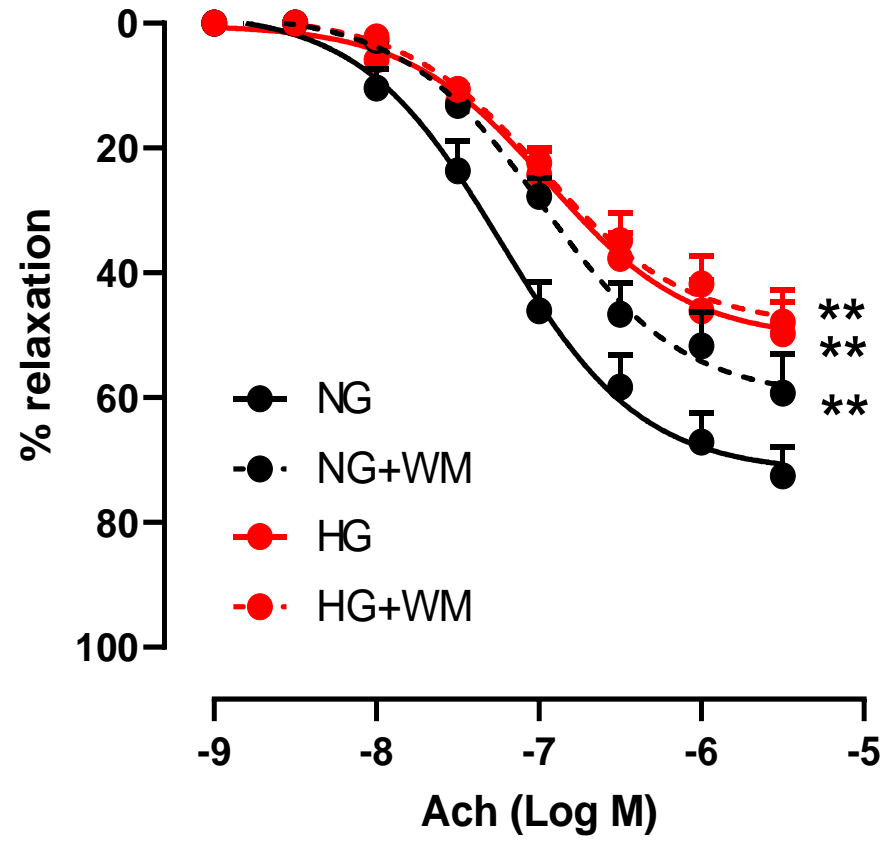

Supplemental figure S4

Supplement: mmc1.pdf [file mmc1.pdf]

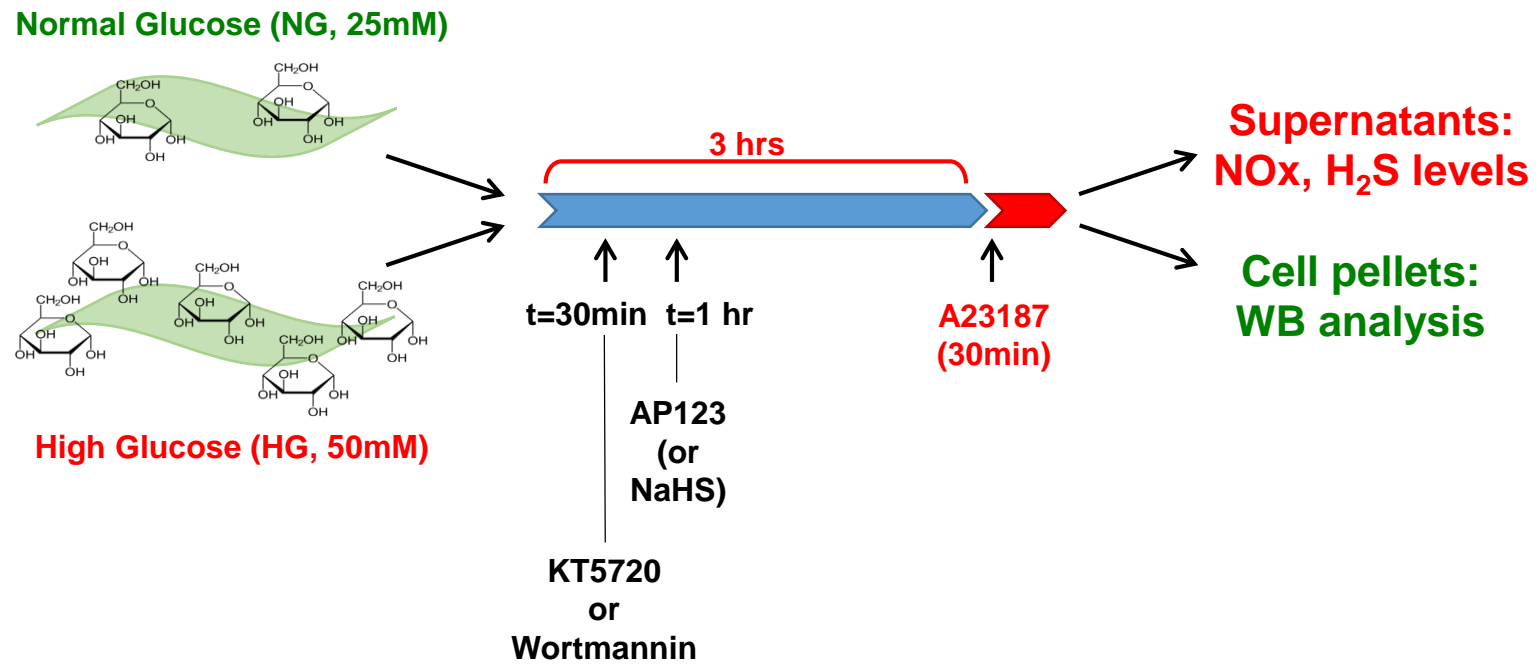

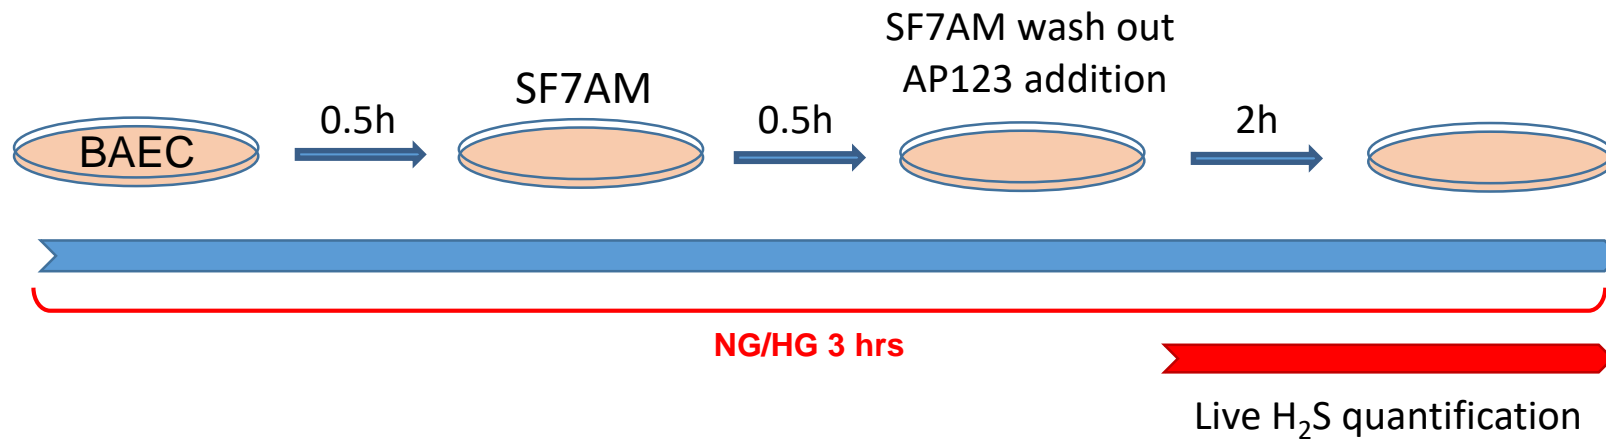

Supplement: mmc2.pdf [file mmc2.pdf]
